# Supplementary material for: Gut Microbiota Functional Traits, Blood pH, and Anti-GAD Antibodies Concur in the Clinical Characterization of T1D at Onset
Source: MDPI journal article supplement (doi:10.3390/ijms231810256), 2022-09-06
Supplement: s1 [file s1]

## Supplementary materials

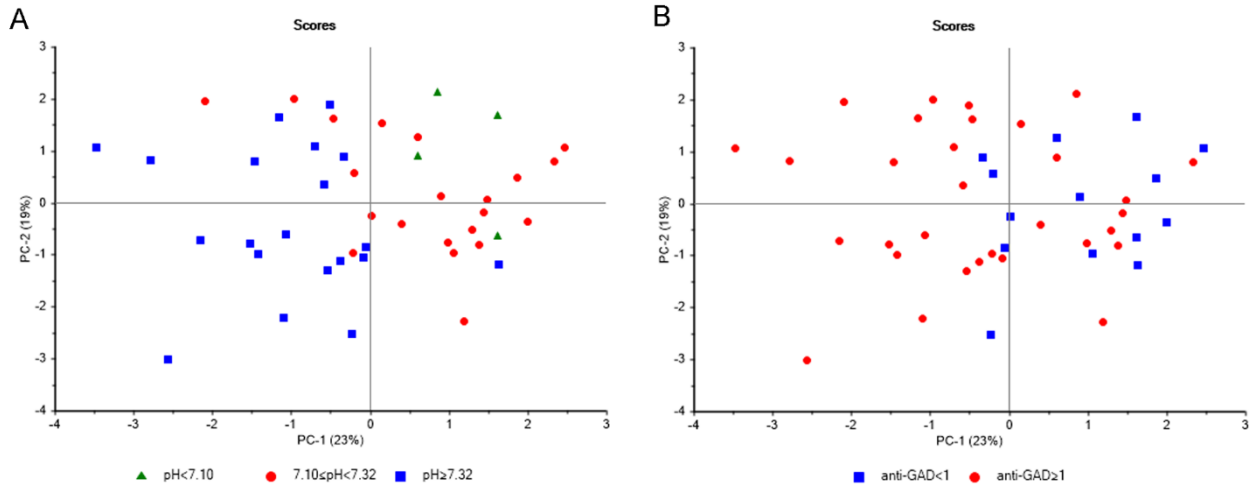

**Figure S1. PCA score plots with labels based on severity thresholds identified for the clinical parameters blood pH and anti-GAD.** Panel A: blue: blood  $\text{pH} \geq 7.32$ ; red:  $7.10 \leq \text{blood pH} < 7.32$ ; green: blood  $\text{pH} < 7.10$ . Panel B: red  $\text{anti-GAD} \geq 1$ ; blue:  $\text{anti-GAD} < 1$ .

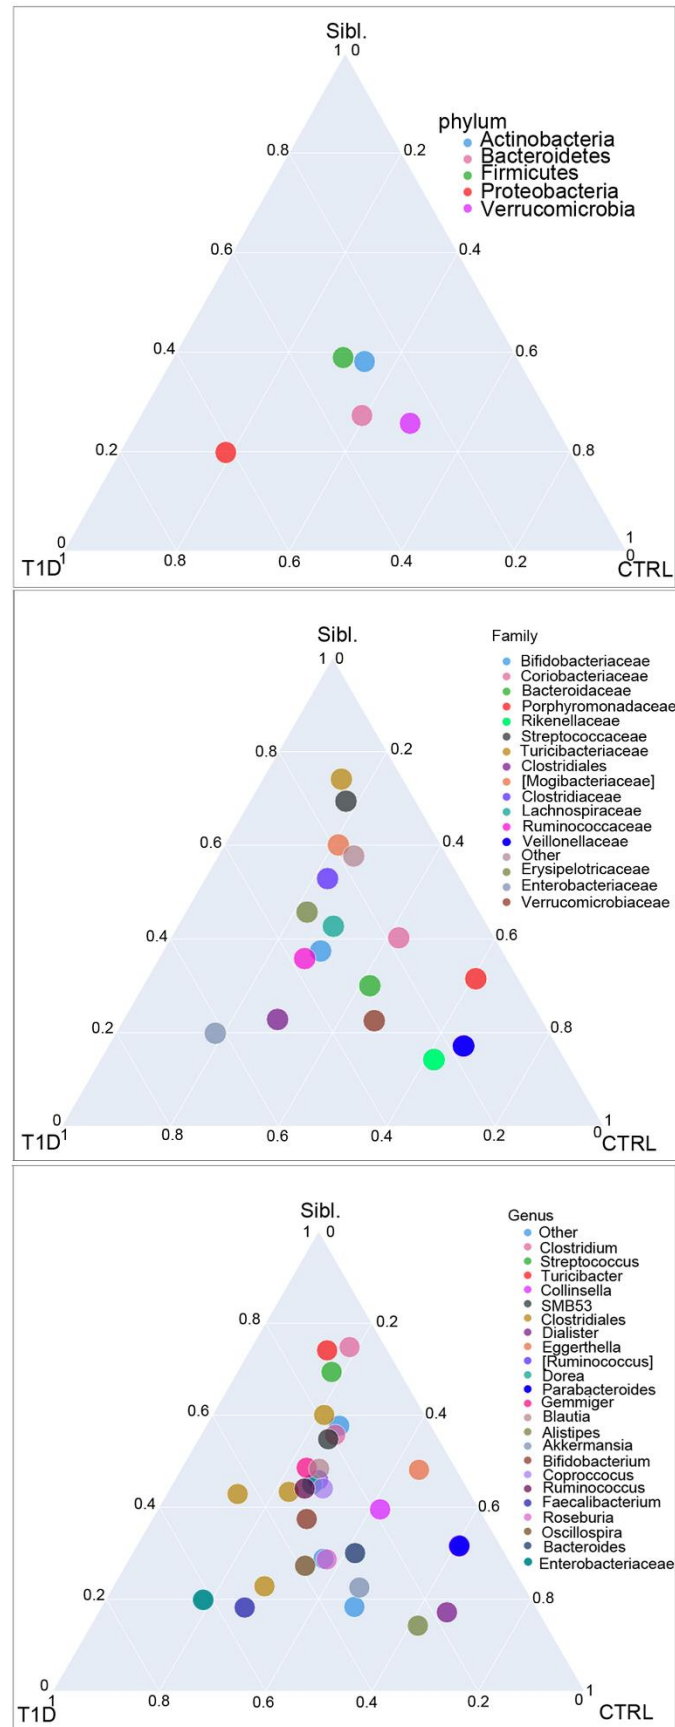

**Figure S2. Ternary plot at phylum, family and genus levels.** In figure are plotted the relative abundances of bacterial taxa shared amongst siblings, T1D patients and CTRL.

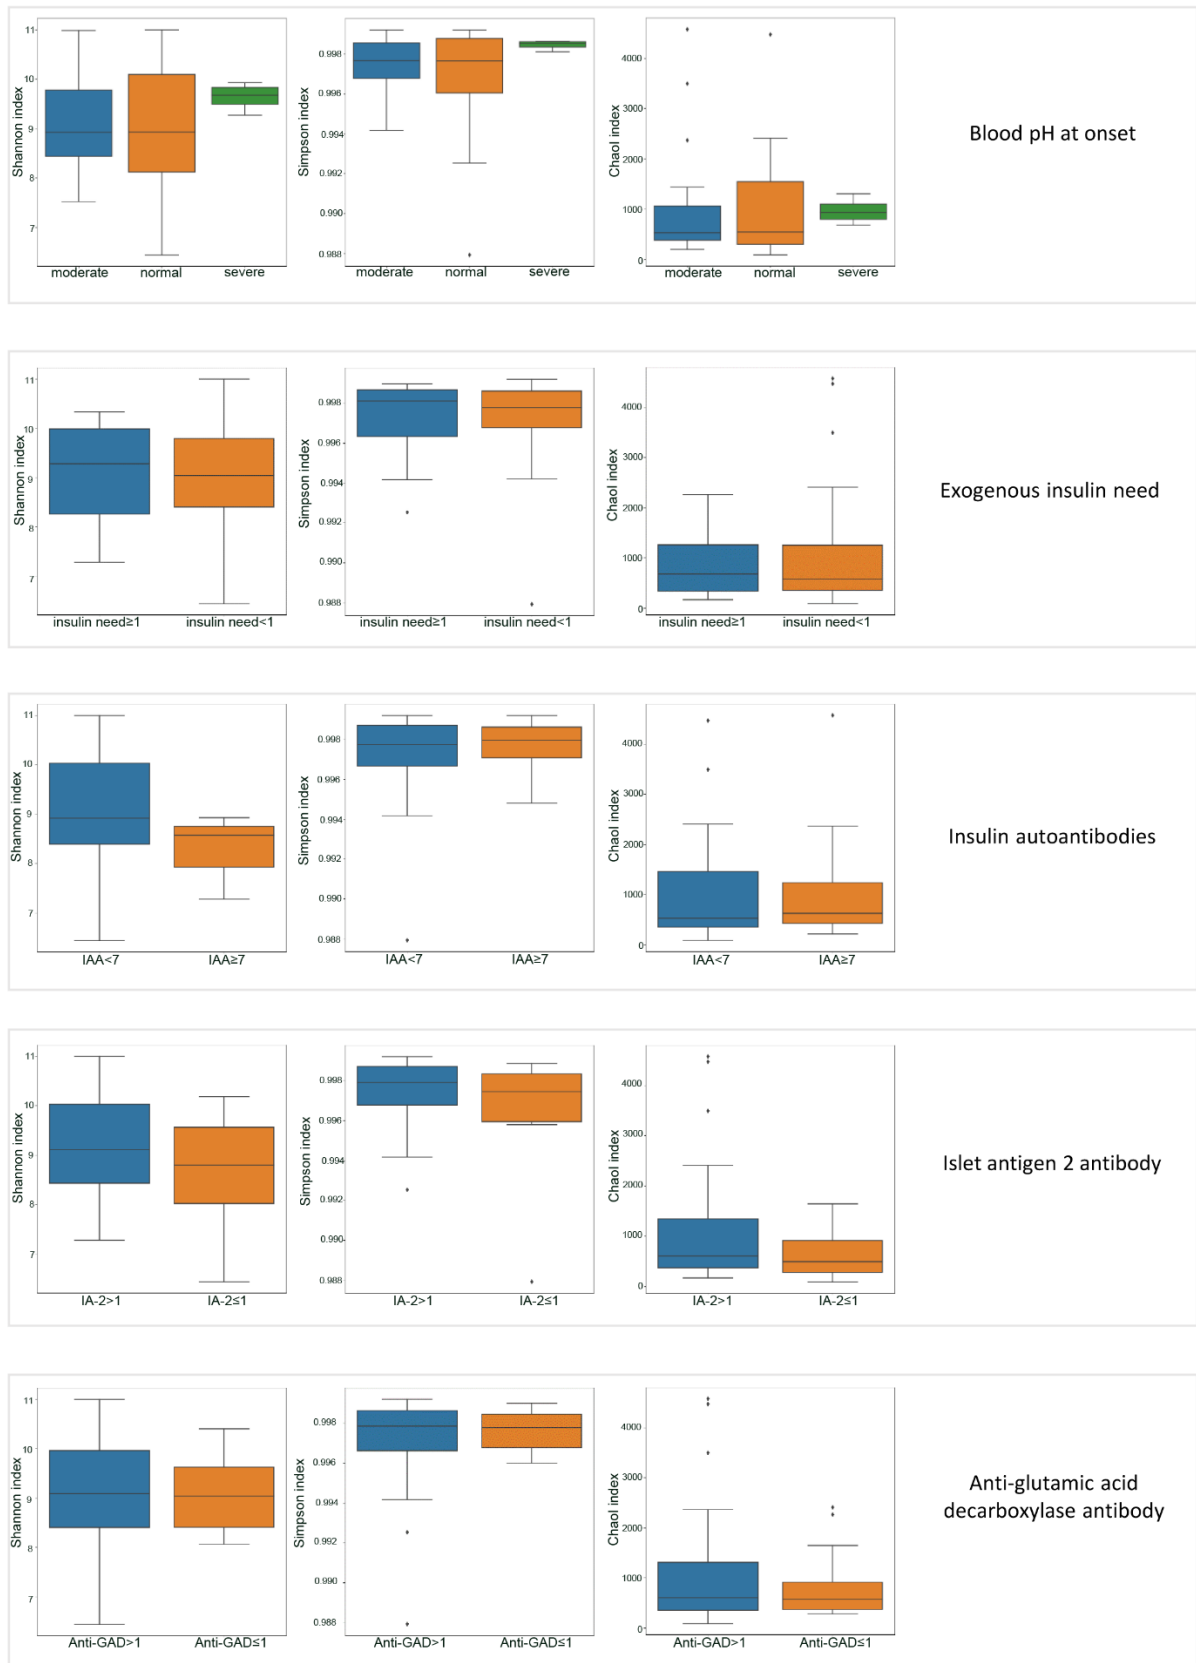

**Figure S3. Alpha-diversity Shannon, Simpson and ChaoI indexes calculated grouping patients for each clinical parameter. Kruskal-Wallis test has been applied for each comparison.**

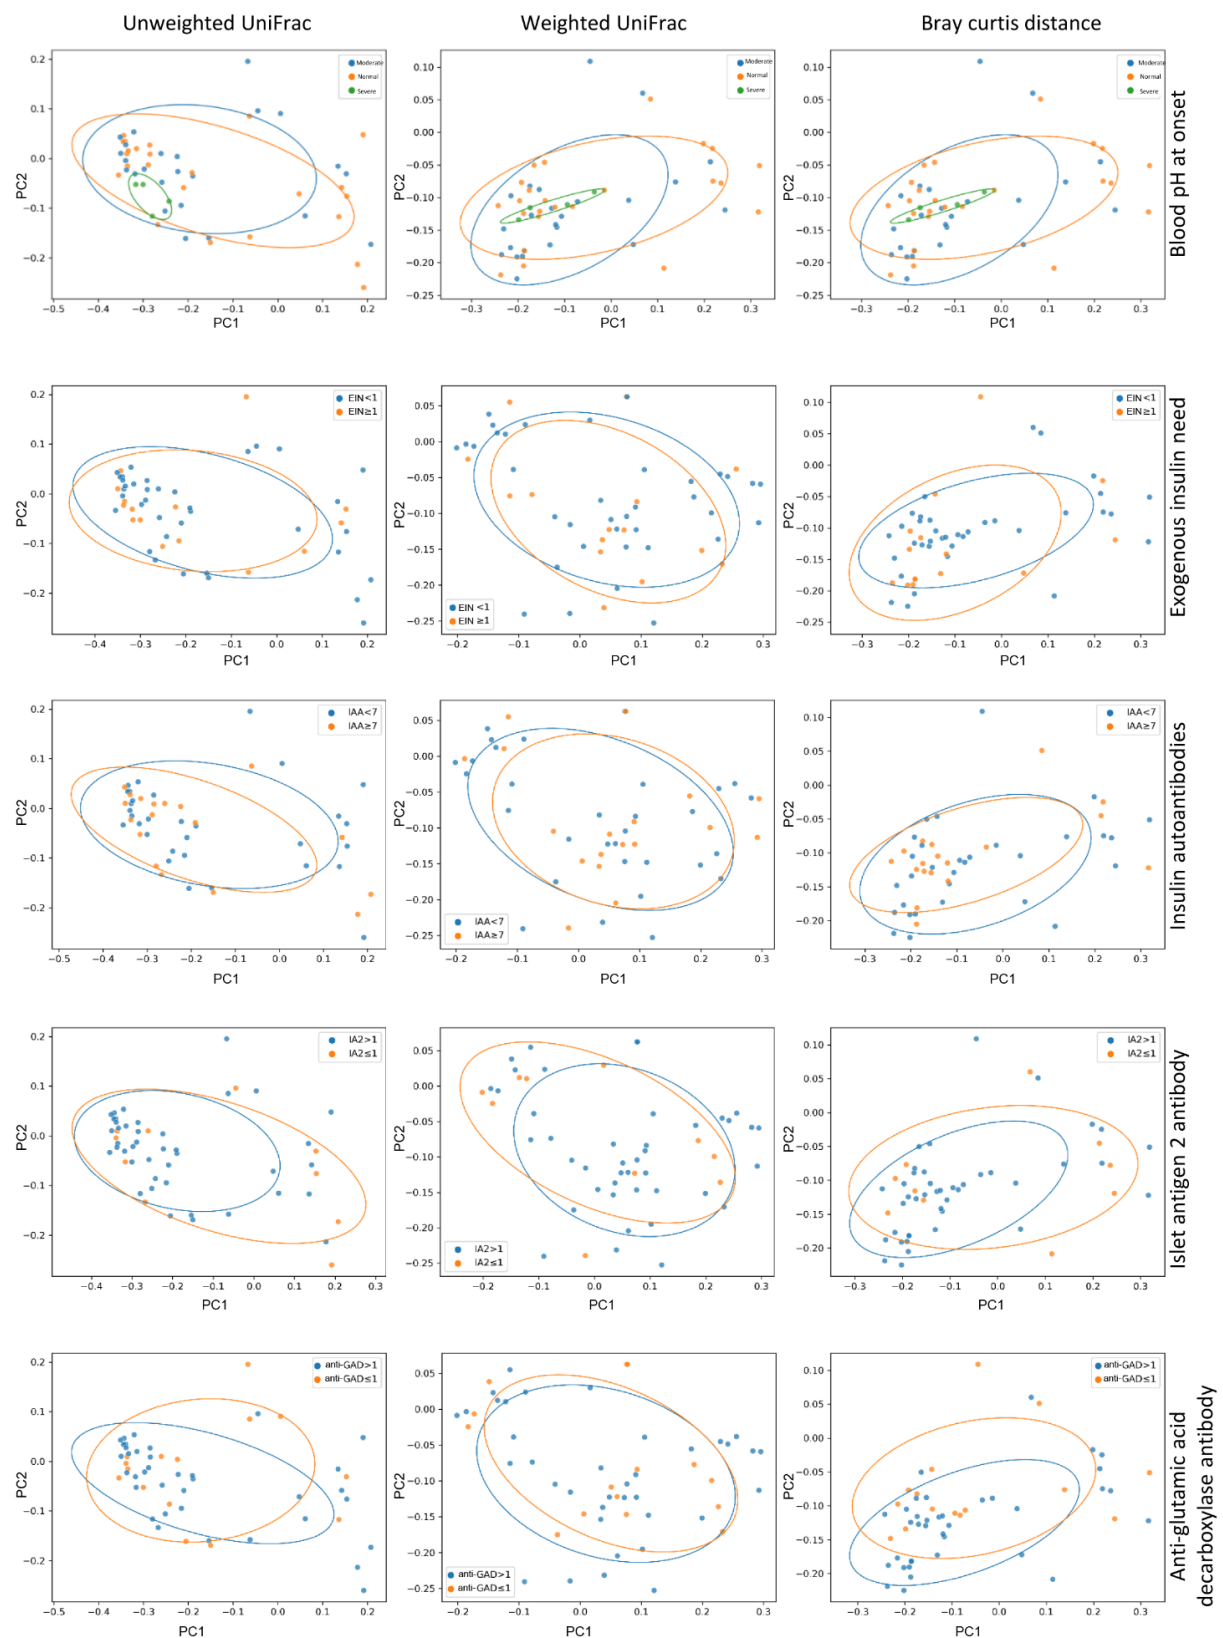

**Figure S4. Beta-diversity PCoA plots on distance matrices calculated by Unweighted UniFrac, Weighted UniFrac and Bray Curtis algorithms grouping patients for each clinical parameter. Permanova analysis has been applied for each comparison.**

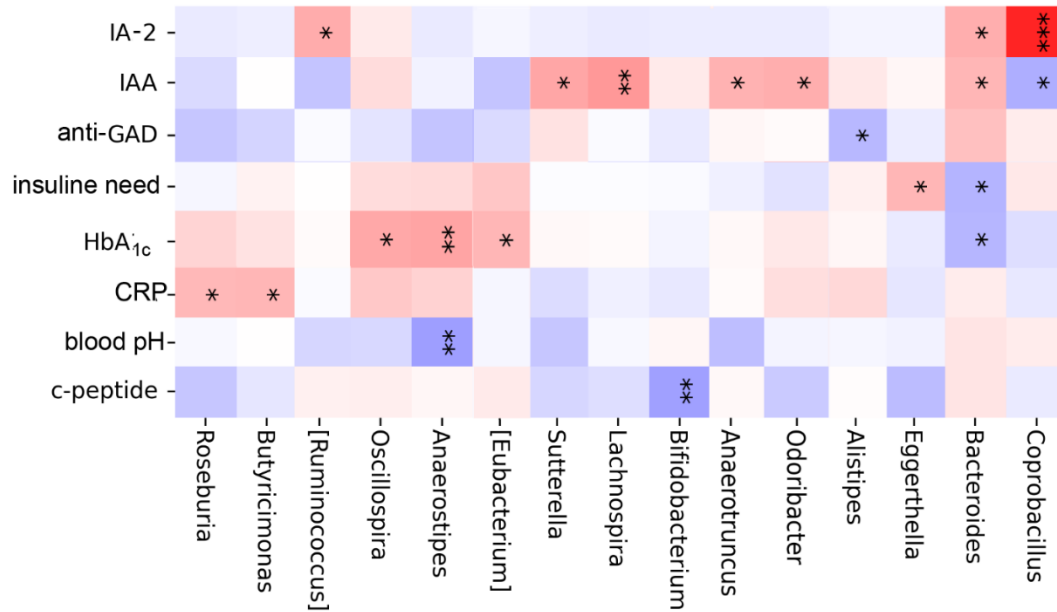

**Figure S5. Microbiota and clinical features correlation.** Pearson's correlation analysis of clinical feature values and relative abundance of microbial taxa. Blue and red shades indicate negative or positive correlations, respectively. The star symbol highlights statistically significant correlations (\* $p$  value <0.05; \*\* $p$  value <0.01; \*\*\* $p$  value <0.0001). Reported correlations are selected on the bases of at least one correlation statistically significant ( $p$  value  $\leq 0.05$ ).

Pearson's correlation analysis revealed a positive correlation between IA-2 antibodies and *Coprobacillus*, *Bacteroides*, and *Ruminococcus* (Lachnospiraceae). IAA antibodies positively correlated with *Sutterella*, *Lachnospira*, *Anaerotruncus*, *Odoribacter*, and *Bacteroides* and negatively with *Coprobacillus*. Anti-GAD antibodies negatively correlated with *Alistipes*. The insulin need correlated positively with *Eggerthella* and negatively with *Bacteroides*. HbA<sub>1c</sub> positively correlated with *Oscillospira*, *Anaerostipes*, *Eubacterium*, and negatively with *Bacteroides*. CRP was positively correlated with *Roseburia* and *Butyricimonas*. Blood pH levels were negatively correlated with *Anaerostipes*. C-peptide was negatively correlated with *Bifidobacterium*.

The positive correlation among *Bacteroides* and levels of IA-2 and IAA and negative with insulin need and HbA<sub>1c</sub> suggested a possible relationship of this genus with the early stage of disease, when antibody levels are increasing but the severity of diabetes, as measured by HbA<sub>1c</sub> and insulin need, is not yet advanced. Interestingly, the relative abundance of *Anaerostipes* increased to the decrease of blood pH levels, leading to presume a possible link of this microorganism with the ketoacidosis status of patients.

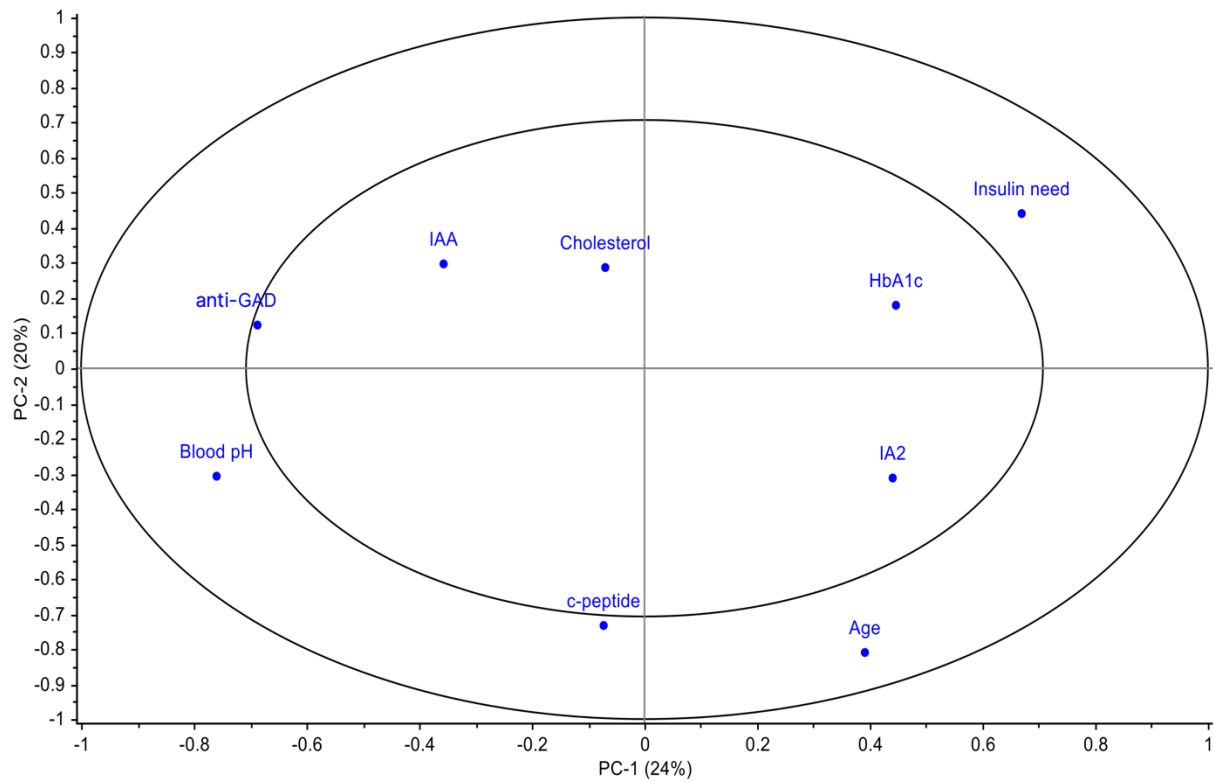

**Figure S6. Principal component analysis (PCA) loadings plot performed on the clinical data matrix of T1D subset.**

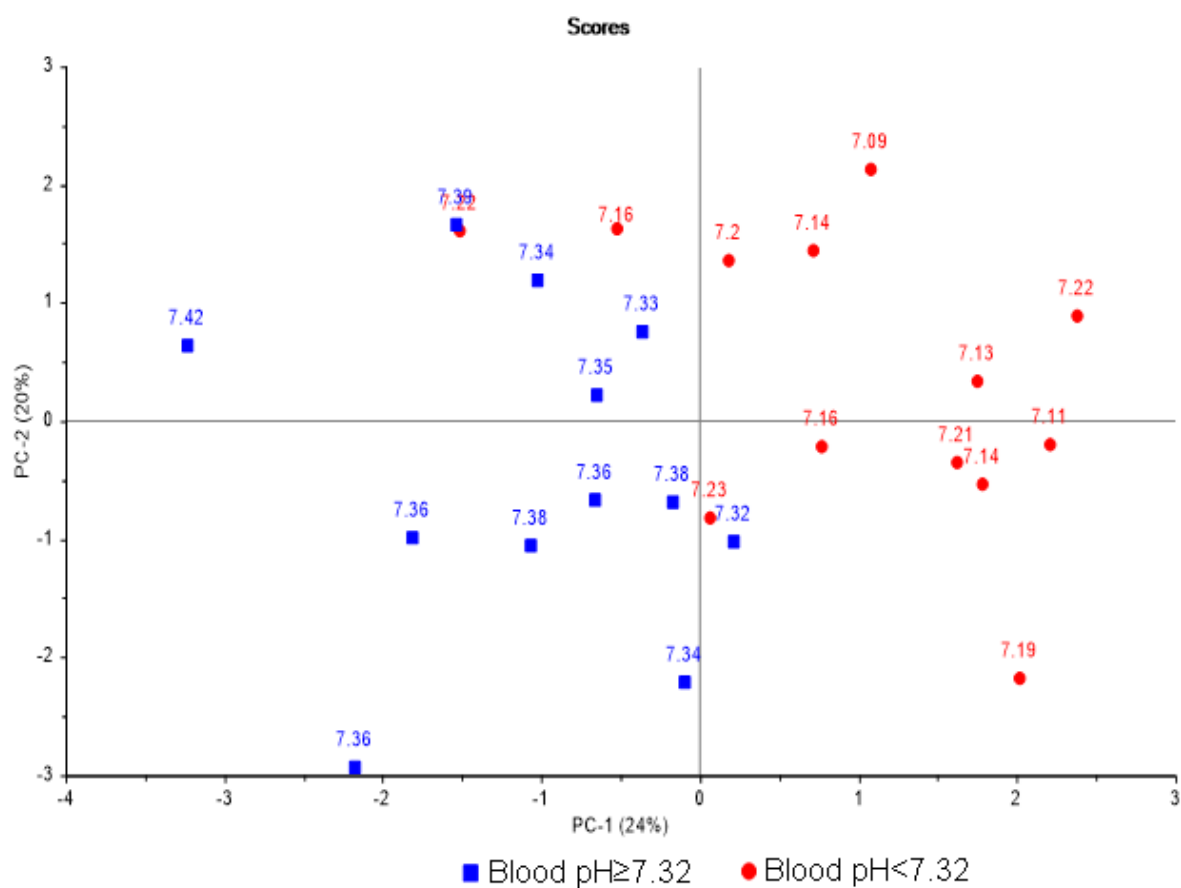

**Figure S7. Principal component analysis (PCA) scores plot performed on clinical data for T1D subset.** Red: T1D patients with blood pH  $< 7.32$ ; blue: T1D patients with blood pH  $\geq 7.32$ .

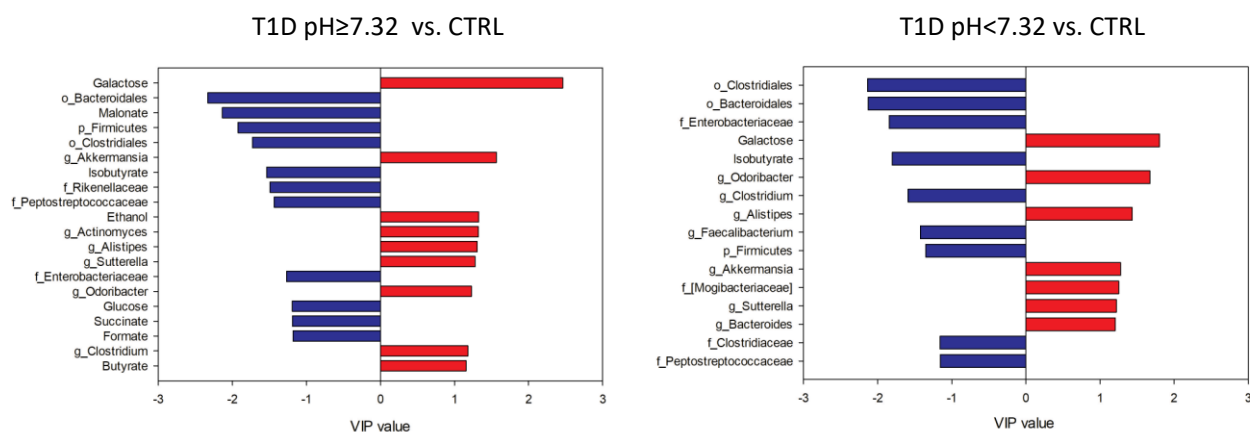

**Figure S8. Variable Importance in Projection (VIP) values of the significant metabolites and ASVs in the omics-data integration analysis.** In blue the feature's levels higher in T1D pH $\geq$ 7.32 and T1D pH<7.32; in red the feature's levels higher in CTRL. In the comparison between T1D pH $\geq$ 7.32 and CTRL, patients showed higher levels of malonate, isobutyrate, glucose, succinate, formate, Rikenellaceae, Peptostreptococcaceae, Enterobacteriaceae, Clostridiales, Bacteroidales and Firmicutes, while CTRL showed higher levels of galactose, ethanol, butyrate, *Akkermansia*, *Actinomyces*, *Alistipes*, *Sutterella*, *Odoribacter* and *Clostridium* (Clostridiaceae).

The features higher in T1D pH<7.32 in comparison with CTRL were isobutyrate, *Clostridium* (Lachnospiraceae), *Faecalibacterium*, Enterobacteriaceae, Clostridiaceae, Peptostreptococcaceae, Clostridiales, Bacteroidales and Firmicutes. CTRL showed higher levels of galactose, *Odoribacter*, *Alistipes*, *Akkermansia*, *Sutterella*, Mogibacteriaceae and *Bacteroides*.



**Table S1 A. Kruskal-Wallis test amongst siblings, T1D patients and CTRL.** For each group are reported the relative abundance average value of ASVs, and in bold the  $p$  values  $\leq 0.05$  and FDR  $< 0.1$ .

| Phylum          | Family                    | Genus                   | Sibling | T1D patients | CTRL   | p value      | FDR_P        |
|-----------------|---------------------------|-------------------------|---------|--------------|--------|--------------|--------------|
| Actinobacteria  | Bifidobacteriaceae        | <i>Bifidobacterium</i>  | 0.0424  | 0.0360       | 0.0358 | 0.126        | 0.233        |
| Actinobacteria  | Coriobacteriaceae         | <i>Collinsella</i>      | 0.0106  | 0.0057       | 0.0121 | <b>0.000</b> | <b>0.002</b> |
| Bacteroidetes   | Bacteroidaceae            | <i>Bacteroides</i>      | 0.1157  | 0.1445       | 0.1390 | 0.732        | 0.799        |
| Bacteroidetes   | Rikenellaceae             | <i>Alistipes</i>        | 0.0068  | 0.0088       | 0.0228 | 0.571        | 0.653        |
| Firmicutes      | Enterococcaceae           | <i>Enterococcus</i>     | 0.0413  | 0.0137       | 0.0028 | 0.864        | 0.902        |
| Firmicutes      | Streptococcaceae          | <i>Streptococcus</i>    | 0.0432  | 0.0110       | 0.0168 | <b>0.001</b> | <b>0.006</b> |
| Firmicutes      | Clostridiales unk. family |                         | 0.0325  | 0.0322       | 0.0185 | <b>0.000</b> | <b>0.000</b> |
| Firmicutes      | Clostridiaceae            | <i>Clostridium</i>      | 0.0112  | 0.0044       | 0.0055 | <b>0.000</b> | <b>0.002</b> |
| Firmicutes      | Lachnospiraceae           |                         | 0.0146  | 0.0248       | 0.0156 | <b>0.009</b> | <b>0.036</b> |
| Firmicutes      | Lachnospiraceae           | <i>Ruminococcus</i>     | 0.0165  | 0.0077       | 0.0109 | 0.050        | 0.121        |
| Firmicutes      | Lachnospiraceae           | <i>Blautia</i>          | 0.0558  | 0.0272       | 0.0262 | 0.188        | 0.301        |
| Firmicutes      | Lachnospiraceae           | <i>Coprococcus</i>      | 0.0227  | 0.0125       | 0.0156 | 0.042        | 0.111        |
| Firmicutes      | Lachnospiraceae           | <i>Dorea</i>            | 0.0283  | 0.0235       | 0.0160 | <b>0.015</b> | <b>0.046</b> |
| Firmicutes      | Lachnospiraceae           | <i>Roseburia</i>        | 0.0168  | 0.0130       | 0.0222 | 0.516        | 0.651        |
| Firmicutes      | Ruminococcaceae           |                         | 0.0168  | 0.0243       | 0.0294 | 0.305        | 0.430        |
| Firmicutes      | Ruminococcaceae           |                         | 0.0086  | 0.0168       | 0.0245 | 0.228        | 0.342        |
| Firmicutes      | Ruminococcaceae           | <i>Faecalibacterium</i> | 0.0240  | 0.0864       | 0.0368 | 0.569        | 0.653        |
| Firmicutes      | Ruminococcaceae           | <i>Gemmiger</i>         | 0.0943  | 0.0519       | 0.0525 | 0.168        | 0.288        |
| Firmicutes      | Ruminococcaceae           | <i>Oscillospira</i>     | 0.0160  | 0.0134       | 0.0223 | 0.392        | 0.522        |
| Firmicutes      | Ruminococcaceae           | <i>Ruminococcus</i>     | 0.0403  | 0.0333       | 0.0292 | 0.062        | 0.135        |
| Firmicutes      | Veillonellaceae           | <i>Dialister</i>        | 0.0090  | 0.0077       | 0.0424 | <b>0.000</b> | <b>0.002</b> |
| Proteobacteria  | Enterobacteriaceae        |                         | 0.0525  | 0.1661       | 0.0485 | 0.085        | 0.171        |
| Verrucomicrobia | Verrucomicrobiaceae       | <i>Akkermansia</i>      | 0.1043  | 0.1039       | 0.1978 | <b>0.014</b> | <b>0.046</b> |

**Table S1 B. Relative abundance values of *Akkermansia*, *Dialister*, *Dorea* and Clostridiales for each couple composed of the T1D patient and the relative sibling, compared to the CTRLs' mean value.** In bold were highlighted the values lower than the mean of CTRL for *Akkermansia* and *Dialister*, higher than the mean of CTRL for *Dorea* and Clostridiales.

| <i>Akkermansia</i> | Sibling           | T1D               | Mean CTRL |
|--------------------|-------------------|-------------------|-----------|
| Couple 01          | <b>0.007427</b>   | <b>0.00639923</b> | 0.1978    |
| Couple 02          | <b>0.00145528</b> | 0.38080781        |           |
| Couple 03          | <b>0.00598457</b> | 0.24001653        |           |
| Couple 04          | <b>0.17859146</b> | <b>0.00548357</b> |           |
| Couple 05          | 0.58068875        | <b>0.19049835</b> |           |
| Couple 06          | <b>0.00060077</b> | <b>0.00033585</b> |           |
| Couple 07          | <b>0.00055423</b> | <b>0</b>          |           |
| Couple 08          | 0.41345445        | <b>0.00010904</b> |           |
| Couple 09          | <b>0.00074942</b> | <b>0.00186688</b> |           |
| Couple 10          | <b>0.00108764</b> | <b>0.027406</b>   |           |
| Couple 11          | <b>0.00315965</b> | 0.38168476        |           |
| Couple 12          | <b>0.183344</b>   | <b>0.138876</b>   |           |
| Couple 13          | <b>0.04153661</b> | <b>0.04997096</b> |           |
| Couple 14          | <b>0.08073146</b> | <b>0.00491362</b> |           |

| <i>Dialister</i> | Sibling           | T1D               | Mean CTRL |
|------------------|-------------------|-------------------|-----------|
| Couple 01        | <b>0.00015</b>    | <b>0</b>          | 0.0424    |
| Couple 02        | <b>0</b>          | <b>0.00016499</b> |           |
| Couple 03        | <b>0.00248234</b> | <b>0.01046133</b> |           |
| Couple 04        | <b>0.00022949</b> | <b>0</b>          |           |
| Couple 05        | <b>0.00103936</b> | <b>0</b>          |           |
| Couple 06        | <b>0.00603563</b> | <b>0.00547236</b> |           |
| Couple 07        | <b>0.0018885</b>  | <b>0.00077</b>    |           |
| Couple 08        | <b>0.01054266</b> | <b>0.00021808</b> |           |
| Couple 09        | <b>0</b>          | <b>0</b>          |           |
| Couple 10        | <b>0.00111483</b> | <b>0.000359</b>   |           |
| Couple 11        | <b>0.00070004</b> | <b>0.0045217</b>  |           |
| Couple 12        | 0.065164          | <b>0.028426</b>   |           |
| Couple 13        | 0.04798856        | 0.05326983        |           |
| Couple 14        | <b>0.00022769</b> | <b>0.00031701</b> |           |

| <i>Dorea</i> | Sibling           | T1D               | Mean CTRL |
|--------------|-------------------|-------------------|-----------|
| Couple 01    | <b>0.070056</b>   | 0.00853231        | 0.016     |
| Couple 02    | 0.00336335        | 0.00062698        |           |
| Couple 03    | <b>0.04229607</b> | <b>0.01797799</b> |           |
| Couple 04    | <b>0.05543373</b> | 0.0028631         |           |
| Couple 05    | 0.00869595        | 0.00237309        |           |
| Couple 06    | <b>0.02098498</b> | <b>0.01995338</b> |           |
| Couple 07    | <b>0.02580261</b> | 0.00186082        |           |
| Couple 08    | <b>0.05195505</b> | 0.00043616        |           |
| Couple 09    | 0.00685445        | <b>0.07776127</b> |           |
| Couple 10    | <b>0.0200397</b>  | <b>0.044549</b>   |           |
| Couple 11    | <b>0.04824611</b> | 0.01320524        |           |
| Couple 12    | 0.008834          | 0.008386          |           |
| Couple 13    | 0.00551031        | 0.0059705         |           |
| Couple 14    | 0.01239505        | 0.01378982        |           |

| Clostridiales | Sibling           | T1D               | Mean CTRL |
|---------------|-------------------|-------------------|-----------|
| Couple 01     | <b>0.028443</b>   | <b>0.03997798</b> | 0.0185    |
| Couple 02     | <b>0.04601541</b> | <b>0.0655029</b>  |           |
| Couple 03     | <b>0.0290569</b>  | <b>0.03347626</b> |           |
| Couple 04     | <b>0.06889694</b> | <b>0.03741447</b> |           |
| Couple 05     | 0.01016838        | <b>0.04569355</b> |           |
| Couple 06     | <b>0.04733496</b> | <b>0.05187878</b> |           |
| Couple 07     | <b>0.02962066</b> | <b>0.02499278</b> |           |
| Couple 08     | <b>0.03291445</b> | <b>0.05866318</b> |           |
| Couple 09     | <b>0.03697746</b> | 0.0184783         |           |
| Couple 10     | <b>0.04842701</b> | 0.017086          |           |
| Couple 11     | <b>0.03307224</b> | <b>0.03071315</b> |           |
| Couple 12     | <b>0.039772</b>   | <b>0.026204</b>   |           |
| Couple 13     | <b>0.02983591</b> | <b>0.07808108</b> |           |
| Couple 14     | 0.0160666         | <b>0.03479157</b> |           |

**Table S2. Kruskal-Wallis test on clinical features.** For each group are reported the relative abundance average value of ASVs and in bold the *p* values  $\leq 0.05$  and FDR  $\leq 0.1$ .

|                 |                     |                         | Blood pH at onset      |              |         |         |                          | Exogenous insulin need |          |         |       |
|-----------------|---------------------|-------------------------|------------------------|--------------|---------|---------|--------------------------|------------------------|----------|---------|-------|
| Phylum          | Family              | Genus                   | severe                 | moderate     | normal  | p value | FDR                      | FI $\geq 1$            | FI $< 1$ | p value | FDR   |
| Actinobacteria  | Bifidobacteriaceae  | <i>Bifidobacterium</i>  | 0.0257                 | 0.0400       | 0.0364  | 0.837   | 0.862                    | 0.0289                 | 0.0405   | 0.965   | 0.982 |
| Actinobacteria  | Coriobacteriaceae   | <i>Collinsella</i>      | 0.0016                 | 0.0044       | 0.0083  | 0.401   | 0.752                    | 0.0032                 | 0.0072   | 0.334   | 0.877 |
| Bacteroidetes   | Bacteroidaceae      | <i>Bacteroides</i>      | 0.1590                 | 0.1161       | 0.1638  | 0.467   | 0.752                    | 0.1241                 | 0.1492   | 0.982   | 0.982 |
| Bacteroidetes   | Rikenellaceae       | <i>Alistipes</i>        | 0.0094                 | 0.0077       | 0.0086  | 0.125   | 0.599                    | 0.0076                 | 0.0085   | 0.947   | 0.982 |
| Firmicutes      | Enterococcaceae     | <i>Enterococcus</i>     | 0.0000                 | 0.0008       | 0.0302  | 0.470   | 0.752                    | 0.0003                 | 0.0202   | 0.722   | 0.964 |
| Firmicutes      | Streptococcaceae    | <i>Streptococcus</i>    | 0.0125                 | 0.0053       | 0.0173  | 0.467   | 0.752                    | 0.0098                 | 0.0122   | 0.842   | 0.982 |
| Firmicutes      | Clostridiaceae      | <i>Clostridium</i>      | 0.0016                 | 0.0050       | 0.0048  | 0.614   | 0.862                    | 0.0056                 | 0.0042   | 0.413   | 0.877 |
| Firmicutes      | Lachnospiraceae     | <i>Blautia</i>          | 0.0196                 | 0.0202       | 0.0372  | 0.246   | 0.752                    | 0.0282                 | 0.0281   | 0.426   | 0.877 |
| Firmicutes      | Lachnospiraceae     | <i>Coprococcus</i>      | 0.0148                 | 0.0089       | 0.0160  | 0.862   | 0.862                    | 0.0085                 | 0.0144   | 0.595   | 0.953 |
| Firmicutes      | Lachnospiraceae     | <i>Dorea</i>            | 0.0451                 | 0.0221       | 0.0225  | 0.851   | 0.862                    | 0.0289                 | 0.0223   | 0.791   | 0.982 |
| Firmicutes      | Lachnospiraceae     | <i>Roseburia</i>        | 0.0044                 | 0.0108       | 0.0136  | 0.631   | 0.862                    | 0.0088                 | 0.0127   | 0.095   | 0.877 |
| Firmicutes      | Lachnospiraceae     | <i>Ruminococcus</i>     | 0.0153                 | 0.0085       | 0.0064  | 0.418   | 0.752                    | 0.0077                 | 0.0082   | 0.595   | 0.953 |
| Firmicutes      | Lachnospiraceae     |                         | 0.0342                 | 0.0263       | 0.0231  | 0.230   | 0.752                    | 0.0262                 | 0.0251   | 0.278   | 0.877 |
| Firmicutes      | Ruminococcaceae     | <i>Faecalibacterium</i> | 0.2615                 | 0.0870       | 0.0632  | 0.039   | 0.475                    | 0.0400                 | 0.1101   | 0.259   | 0.877 |
| Firmicutes      | Ruminococcaceae     | <i>Gemmiger</i>         | 0.0153                 | 0.0373       | 0.0718  | 0.419   | 0.752                    | 0.0522                 | 0.0515   | 0.543   | 0.953 |
| Firmicutes      | Ruminococcaceae     | <i>Oscillospira</i>     | 0.0095                 | 0.0174       | 0.0106  | 0.722   | 0.862                    | 0.0188                 | 0.0114   | 0.215   | 0.877 |
| Firmicutes      | Ruminococcaceae     | <i>Ruminococcus</i>     | 0.0168                 | 0.0315       | 0.0385  | 0.833   | 0.862                    | 0.0481                 | 0.0278   | 0.439   | 0.877 |
| Firmicutes      | Ruminococcaceae     |                         | 0.0594                 | 0.0178       | 0.0253  | 0.059   | 0.475                    | 0.0262                 | 0.0241   | 0.642   | 0.963 |
| Firmicutes      | Clostridiales       |                         | 0.0369                 | 0.0367       | 0.0280  | 0.459   | 0.752                    | 0.0343                 | 0.0320   | 0.723   | 0.964 |
| Firmicutes      | Veillonellaceae     | <i>Dialister</i>        | 0.0023                 | 0.0055       | 0.0100  | 0.725   | 0.862                    | 0.0041                 | 0.0086   | 0.343   | 0.877 |
| Proteobacteria  | Enterobacteriaceae  |                         | 0.0699                 | 0.2562       | 0.1180  | 0.058   | 0.475                    | 0.2373                 | 0.1517   | 0.199   | 0.877 |
| Verrucomicrobia | Verrucomicrobiaceae | <i>Akkermansia</i>      | 0.0953                 | 0.0779       | 0.0939  | 0.305   | 0.752                    | 0.1037                 | 0.0801   | 0.192   | 0.877 |
|                 |                     |                         | insulin autoantibodies |              |         |         | islet antigen 2 antibody |                        |          |         |       |
| Phylum          | Family              | Genus                   | IAA $< 7$              | IAA $\geq 7$ | p value | FDR     | IA-2 $\leq 1$            | IA-2 $> 1$             | p value  | FDR     |       |
| Actinobacteria  | Bifidobacteriaceae  | <i>Bifidobacterium</i>  | 0.0278                 | 0.0533       | 0.340   | 0.975   | 0.0655                   | 0.0308                 | 0.394    | 0.847   |       |
| Actinobacteria  | Coriobacteriaceae   | <i>Collinsella</i>      | 0.0077                 | 0.0031       | 0.933   | 0.975   | 0.0075                   | 0.0057                 | 0.346    | 0.847   |       |
| Bacteroidetes   | Bacteroidaceae      | <i>Bacteroides</i>      | 0.1210                 | 0.1782       | 0.263   | 0.975   | 0.1251                   | 0.1458                 | 0.757    | 0.847   |       |
| Bacteroidetes   | Rikenellaceae       | <i>Alistipes</i>        | 0.0090                 | 0.0071       | 0.934   | 0.975   | 0.0139                   | 0.0070                 | 0.624    | 0.847   |       |
| Firmicutes      | Enterococcaceae     | <i>Enterococcus</i>     | 0.0228                 | 0.0001       | 0.124   | 0.975   | 0.0638                   | 0.0034                 | 0.202    | 0.847   |       |
| Firmicutes      | Streptococcaceae    | <i>Streptococcus</i>    | 0.0105                 | 0.0132       | 0.901   | 0.975   | 0.0121                   | 0.0114                 | 0.408    | 0.847   |       |
| Firmicutes      | Clostridiaceae      | <i>Clostridium</i>      | 0.0049                 | 0.0043       | 0.443   | 0.975   | 0.0029                   | 0.0050                 | 0.679    | 0.847   |       |
| Firmicutes      | Lachnospiraceae     | <i>Blautia</i>          | 0.0315                 | 0.0224       | 0.917   | 0.975   | 0.0505                   | 0.0231                 | 0.535    | 0.847   |       |

| Firmicutes      | Lachnospiraceae     | <i>Coprococcus</i>      | 0.0159                                    | 0.0072     | 0.245        | 0.975        | 0.0108            | 0.0132  | 0.776   | 0.847 |
|-----------------|---------------------|-------------------------|-------------------------------------------|------------|--------------|--------------|-------------------|---------|---------|-------|
| Firmicutes      | Lachnospiraceae     | <i>Dorea</i>            | 0.0215                                    | 0.0289     | 0.803        | 0.975        | 0.0235            | 0.0243  | 0.757   | 0.847 |
| Firmicutes      | Lachnospiraceae     | <i>Roseburia</i>        | 0.0141                                    | 0.0071     | 0.548        | 0.975        | 0.0050            | 0.0130  | 0.519   | 0.847 |
| Firmicutes      | Lachnospiraceae     | <i>Ruminococcus</i>     | 0.0090                                    | 0.0064     | 0.507        | 0.975        | 0.0085            | 0.0079  | 0.394   | 0.847 |
| Firmicutes      | Lachnospiraceae     |                         | 0.0217                                    | 0.0318     | 0.494        | 0.975        | 0.0467            | 0.0206  | 0.016   | 0.392 |
| Firmicutes      | Ruminococcaceae     | <i>Faecalibacterium</i> | 0.0750                                    | 0.1160     | 0.619        | 0.975        | 0.0181            | 0.1062  | 0.642   | 0.847 |
| Firmicutes      | Ruminococcaceae     | <i>Gemmiger</i>         | 0.0572                                    | 0.0421     | 0.604        | 0.975        | 0.0234            | 0.0580  | 0.439   | 0.847 |
| Firmicutes      | Ruminococcaceae     | <i>Oscillospira</i>     | 0.0128                                    | 0.0149     | 0.351        | 0.975        | 0.0109            | 0.0142  | 0.661   | 0.847 |
| Firmicutes      | Ruminococcaceae     | <i>Ruminococcus</i>     | 0.0374                                    | 0.0270     | 0.820        | 0.975        | 0.0107            | 0.0387  | 0.134   | 0.847 |
| Firmicutes      | Ruminococcaceae     |                         | 0.0190                                    | 0.0346     | 0.158        | 0.975        | 0.0326            | 0.0229  | 0.857   | 0.894 |
| Firmicutes      | Clostridiales       |                         | 0.0298                                    | 0.0376     | 0.534        | 0.975        | 0.0375            | 0.0315  | 0.245   | 0.847 |
| Firmicutes      | Veillonellaceae     | <i>Dialister</i>        | 0.0081                                    | 0.0059     | 0.975        | 0.975        | 0.0144            | 0.0057  | 0.706   | 0.847 |
| Proteobacteria  | Enterobacteriaceae  |                         | 0.2043                                    | 0.1277     | 0.828        | 0.975        | 0.1358            | 0.1852  | 0.561   | 0.847 |
| Verrucomicrobia | Verrucomicrobiaceae | <i>Akkermansia</i>      | 0.0916                                    | 0.0785     | 0.967        | 0.975        | 0.0953            | 0.0849  | 0.959   | 0.959 |
|                 |                     |                         | anti-glutamic acid decarboxylase antibody |            |              |              | Blood pH at onset |         |         |       |
| Phylum          | Family              | Genus                   | anti-GAD≤1                                | anti-GAD>1 | p value      | FDR          | pH<7.32           | pH≥7.32 | p value | FDR   |
| Actinobacteria  | Bifidobacteriaceae  | <i>Bifidobacterium</i>  | 0.0416                                    | 0.0352     | 0.588        | 0.796        | 0.0312            | 0.0201  | 0.057   | 0.344 |
| Actinobacteria  | Coriobacteriaceae   | <i>Collinsella</i>      | 0.0090                                    | 0.0047     | 0.597        | 0.796        | 0.0010            | 0.0007  | 0.099   | 0.396 |
| Bacteroidetes   | Bacteroidaceae      | <i>Bacteroides</i>      | 0.1274                                    | 0.1485     | 0.879        | 0.953        | 0.0993            | 0.2781  | 0.181   | 0.543 |
| Bacteroidetes   | Rikenellaceae       | <i>Alistipes</i>        | 0.0180                                    | 0.0040     | <b>0.010</b> | <b>0.078</b> | 0.0030            | 0.0051  | 0.778   | 0.778 |
| Firmicutes      | Enterococcaceae     | <i>Enterococcus</i>     | 0.0041                                    | 0.0191     | 0.576        | 0.796        | 0.0004            | 0.0019  | 0.346   | 0.597 |
| Firmicutes      | Streptococcaceae    | <i>Streptococcus</i>    | 0.0071                                    | 0.0135     | 0.447        | 0.759        | 0.0044            | 0.0020  | 0.307   | 0.597 |
| Firmicutes      | Clostridiaceae      | <i>Clostridium</i>      | 0.0015                                    | 0.0060     | 0.113        | 0.579        | 0.0077            | 0.0010  | 0.020   | 0.344 |
| Firmicutes      | Lachnospiraceae     | <i>Blautia</i>          | 0.0351                                    | 0.0251     | 0.318        | 0.695        | 0.0102            | 0.0086  | 0.778   | 0.778 |
| Firmicutes      | Lachnospiraceae     | <i>Coprococcus</i>      | 0.0178                                    | 0.0105     | 0.241        | 0.644        | 0.0065            | 0.0040  | 0.439   | 0.619 |
| Firmicutes      | Lachnospiraceae     | <i>Dorea</i>            | 0.0215                                    | 0.0254     | 0.398        | 0.759        | 0.0282            | 0.0063  | 0.398   | 0.597 |
| Firmicutes      | Lachnospiraceae     | <i>Roseburia</i>        | 0.0210                                    | 0.0074     | <b>0.009</b> | <b>0.078</b> | 0.0055            | 0.0069  | 0.526   | 0.702 |
| Firmicutes      | Lachnospiraceae     | <i>Ruminococcus</i>     | 0.0070                                    | 0.0085     | 0.914        | 0.953        | 0.0120            | 0.0033  | 0.049   | 0.344 |
| Firmicutes      | Lachnospiraceae     |                         | 0.0259                                    | 0.0252     | 0.448        | 0.759        | 0.0307            | 0.0167  | 0.078   | 0.376 |
| Firmicutes      | Ruminococcaceae     | <i>Faecalibacterium</i> | 0.2109                                    | 0.0367     | <b>0.004</b> | <b>0.078</b> | 0.0789            | 0.1181  | 0.324   | 0.597 |
| Firmicutes      | Ruminococcaceae     | <i>Gemmiger</i>         | 0.0346                                    | 0.0592     | 0.879        | 0.953        | 0.0416            | 0.0206  | 0.725   | 0.778 |
| Firmicutes      | Ruminococcaceae     | <i>Oscillospira</i>     | 0.0186                                    | 0.0113     | 0.288        | 0.691        | 0.0142            | 0.0106  | 0.673   | 0.778 |
| Firmicutes      | Ruminococcaceae     | <i>Ruminococcus</i>     | 0.0590                                    | 0.0224     | 0.165        | 0.579        | 0.0288            | 0.0120  | 0.260   | 0.597 |
| Firmicutes      | Ruminococcaceae     |                         | 0.0230                                    | 0.0254     | 0.474        | 0.759        | 0.0294            | 0.0204  | 0.398   | 0.597 |
| Firmicutes      | Clostridiales       |                         | 0.0277                                    | 0.0348     | 0.633        | 0.800        | 0.0508            | 0.0246  | 0.049   | 0.344 |
| Firmicutes      | Veillonellaceae     | <i>Dialister</i>        | 0.0156                                    | 0.0037     | 0.186        | 0.579        | 0.0067            | 0.0147  | 0.168   | 0.543 |

|                 |                     |                         |                          |             |                |            |                          |             |                |            |
|-----------------|---------------------|-------------------------|--------------------------|-------------|----------------|------------|--------------------------|-------------|----------------|------------|
| Proteobacteria  | Enterobacteriaceae  |                         | 0.0949                   | 0.2120      | 0.193          | 0.579      | 0.2461                   | 0.2006      | 0.360          | 0.597      |
| Verrucomicrobia | Verrucomicrobiaceae | <i>Akkermansia</i>      | 0.0380                   | 0.1083      | 0.140          | 0.579      | 0.1121                   | 0.1096      | 0.751          | 0.778      |
|                 |                     |                         | <b>Blood pH at onset</b> |             |                |            | <b>Blood pH at onset</b> |             |                |            |
| <b>Phylum</b>   | <b>Family</b>       | <b>Genus</b>            | <b>pH&lt;7.32</b>        | <b>CTRL</b> | <b>p value</b> | <b>FDR</b> | <b>pH≥7.32</b>           | <b>CTRL</b> | <b>p value</b> | <b>FDR</b> |
| Actinobacteria  | Bifidobacteriaceae  | <i>Bifidobacterium</i>  | 0.0312                   | 0.0374      | 0.673          | 0.897      | 0.0201                   | 0.0374      | 0.070          | 0.186      |
| Actinobacteria  | Coriobacteriaceae   | <i>Collinsella</i>      | 0.0010                   | 0.0117      | 0.024          | 0.139      | 0.0007                   | 0.0117      | 0.008          | 0.137      |
| Bacteroidetes   | Bacteroidaceae      | <i>Bacteroides</i>      | 0.0993                   | 0.1123      | 0.324          | 0.519      | 0.2781                   | 0.1123      | 0.070          | 0.186      |
| Bacteroidetes   | Rikenellaceae       | <i>Alistipes</i>        | 0.0030                   | 0.0145      | 0.833          | 0.908      | 0.0051                   | 0.0145      | 1.000          | 1.000      |
| Firmicutes      | Enterococcaceae     | <i>Enterococcus</i>     | 0.0004                   | 0.0000      | 0.016          | 0.124      | 0.0019                   | 0.0000      | 0.061          | 0.186      |
| Firmicutes      | Streptococcaceae    | <i>Streptococcus</i>    | 0.0044                   | 0.0501      | 0.778          | 0.908      | 0.0020                   | 0.0501      | 0.289          | 0.497      |
| Firmicutes      | Clostridiaceae      | <i>Clostridium</i>      | 0.0077                   | 0.0085      | 0.673          | 0.897      | 0.0010                   | 0.0085      | 0.023          | 0.137      |
| Firmicutes      | Lachnospiraceae     | <i>Blautia</i>          | 0.0102                   | 0.0153      | 0.324          | 0.519      | 0.0086                   | 0.0153      | 0.290          | 0.497      |
| Firmicutes      | Lachnospiraceae     | <i>Coprococcus</i>      | 0.0065                   | 0.0132      | 0.181          | 0.434      | 0.0040                   | 0.0132      | 0.028          | 0.137      |
| Firmicutes      | Lachnospiraceae     | <i>Dorea</i>            | 0.0282                   | 0.0260      | 0.944          | 0.985      | 0.0063                   | 0.0260      | 0.406          | 0.649      |
| Firmicutes      | Lachnospiraceae     | <i>Roseburia</i>        | 0.0055                   | 0.0098      | 0.231          | 0.463      | 0.0069                   | 0.0098      | 0.496          | 0.709      |
| Firmicutes      | Lachnospiraceae     | <i>Ruminococcus</i>     | 0.0120                   | 0.0114      | 0.526          | 0.789      | 0.0033                   | 0.0114      | 0.013          | 0.137      |
| Firmicutes      | Lachnospiraceae     |                         | 0.0307                   | 0.0210      | 0.049          | 0.167      | 0.0167                   | 0.0210      | 0.650          | 0.709      |
| Firmicutes      | Ruminococcaceae     | <i>Faecalibacterium</i> | 0.0789                   | 0.0220      | 0.260          | 0.480      | 0.1181                   | 0.0220      | 0.705          | 0.736      |
| Firmicutes      | Ruminococcaceae     | <i>Gemmiger</i>         | 0.0416                   | 0.0340      | 0.832          | 0.908      | 0.0206                   | 0.0340      | 0.650          | 0.709      |
| Firmicutes      | Ruminococcaceae     | <i>Oscillospira</i>     | 0.0142                   | 0.0150      | 0.725          | 0.908      | 0.0106                   | 0.0150      | 0.650          | 0.709      |
| Firmicutes      | Ruminococcaceae     | <i>Ruminococcus</i>     | 0.0288                   | 0.0131      | 1.000          | 1.000      | 0.0120                   | 0.0131      | 0.226          | 0.453      |
| Firmicutes      | Ruminococcaceae     |                         | 0.0294                   | 0.0401      | 0.067          | 0.201      | 0.0204                   | 0.0401      | 0.597          | 0.709      |
| Firmicutes      | Clostridiales       |                         | 0.0508                   | 0.0149      | 0.005          | 0.109      | 0.0246                   | 0.0149      | 0.112          | 0.270      |
| Firmicutes      | Veillonellaceae     | <i>Dialister</i>        | 0.0067                   | 0.0264      | 0.009          | 0.109      | 0.0147                   | 0.0264      | 0.034          | 0.137      |
| Proteobacteria  | Enterobacteriaceae  |                         | 0.2461                   | 0.0126      | 0.029          | 0.139      | 0.2006                   | 0.0126      | 0.597          | 0.709      |
| Verrucomicrobia | Verrucomicrobiaceae | <i>Akkermansia</i>      | 0.1121                   | 0.3042      | 0.049          | 0.167      | 0.1096                   | 0.3042      | 0.034          | 0.137      |

**Table S3. List of metabolites identified in stools by means of NMR spectroscopy.** The univocal assignment was performed on the basis of 2D-experiments: COSY, TOCSY, HSQC and HMBC.

| Nr. | Metabolite         | Group                               | <sup>1</sup> H (ppm) | Molteplcity |
|-----|--------------------|-------------------------------------|----------------------|-------------|
| 1.  | 2-methylbutyrate   | CH <sub>3</sub>                     | 0.86                 |             |
|     |                    |                                     | 1.05                 | t           |
|     |                    |                                     | 1.40                 | d           |
|     |                    |                                     | 1.49                 | m           |
|     |                    |                                     | 2.20                 |             |
| 2.  | Valerate           | CH <sub>3</sub>                     | 0.89                 |             |
|     |                    |                                     | 1.31                 | t           |
|     |                    |                                     | 1.54                 | m           |
|     |                    |                                     | 2.18                 |             |
| 3.  | Isovalerate        | 2 CH <sub>3</sub>                   | 0.91                 | d           |
|     |                    | CH                                  | 1.95                 |             |
|     |                    | CH <sub>2</sub>                     | 2.06                 | d           |
| 4.  | Ile                | CH <sub>3</sub>                     | 0.94                 | t           |
|     |                    |                                     | 1.01                 | d           |
|     |                    |                                     | 1.28                 | m           |
|     |                    | CH <sub>3</sub>                     | 1.48                 |             |
|     |                    |                                     | 1.97                 | m           |
|     |                    |                                     | 3.67                 | d           |
| 5.  | Leu                | CH <sub>3</sub>                     | 0.96                 | d           |
|     |                    | CH <sub>3</sub>                     | 0.97                 | d           |
|     |                    | CH                                  | 1.72                 | m           |
|     |                    | CH <sub>2</sub>                     | 1.72                 | m           |
|     |                    | α-CH                                | 3.74                 | m           |
| 6.  | Val                | CH <sub>3</sub>                     | 0.99                 | d           |
|     |                    | CH <sub>3</sub>                     | 1.05                 | d           |
|     |                    | CH                                  | 2.27                 | m           |
|     |                    | α-CH                                | 3.61                 | d           |
| 7.  | Isobutyrate        | CH <sub>3</sub> , CH <sub>3</sub> ' | 1.07                 | d           |
|     |                    | CH                                  | 2.40                 | m           |
| 8.  | 2-oxoisovalerate   | 2 CH <sub>3</sub>                   | 1.13                 | d           |
|     |                    | CH                                  | 3.04                 | m           |
| 9.  | Ethanol            | CH <sub>3</sub>                     | 1.18                 | t           |
|     |                    | CH <sub>2</sub>                     | 3.65                 | m           |
| 10. | Thr                | CH <sub>3</sub>                     | 1.33                 | d           |
|     |                    | α-CH                                | 3.59                 | d           |
|     |                    | CH                                  | 4.27                 | m           |
| 11. | Lactate            | CH <sub>3</sub>                     | 1.33                 | d           |
|     |                    | CH                                  | 4.13                 | m           |
| 12. | Ala                | CH <sub>3</sub>                     | 1.48                 | d           |
|     |                    | α-CH                                | 3.79                 | q           |
| 13. | 2-aminoisobutyrate | CH <sub>3</sub> , CH <sub>3</sub> ' | 1.47                 | s           |
| 14. | Butyrate           | CH <sub>3</sub>                     | 0.90                 | t           |
|     |                    | β-CH <sub>2</sub>                   | 1.56                 | m           |
|     |                    | α-CH <sub>2</sub>                   | 2.16                 | t           |
| 15. | Lys                | γ-CH <sub>2</sub>                   | 1.46                 |             |
|     |                    | δ-CH <sub>2</sub>                   | 1.72                 | m           |
|     |                    |                                     | 1.94                 |             |
|     |                    | ε-CH <sub>2</sub>                   | 3.04                 |             |
|     |                    | α-CH                                | 3.76                 |             |
| 16. | Acetate            | CH <sub>3</sub>                     | 1.92                 | s           |
| 17. | Propionate         | CH <sub>3</sub>                     | 1.06                 | t           |

|     |                        |                                    |      |    |
|-----|------------------------|------------------------------------|------|----|
|     |                        | CH <sub>2</sub>                    | 2.18 | m  |
| 18. | Glu                    | β-CH                               | 2.06 | pt |
|     |                        | β-CH'                              | 2.12 |    |
|     |                        | γ-CH <sub>2</sub>                  | 2.36 |    |
|     |                        | α-CH                               | 3.76 |    |
| 19. | Succinate              | α,β-CH <sub>2</sub>                | 2.41 | s  |
| 20. | Gln                    | β-CH <sub>2</sub>                  | 2.13 | m  |
|     |                        | γ-CH <sub>2</sub>                  | 2.46 | m  |
|     |                        | α-CH                               | 3.78 |    |
| 21. | Asp                    | β-CH                               | 2.68 | dd |
|     |                        | β-CH'                              | 2.81 | dd |
|     |                        | α-CH                               | 3.91 | dd |
| 22. | DMA                    | CH <sub>3</sub> ,CH <sub>3</sub> ' | 2.75 | s  |
| 23. | TMA                    | 3 CH <sub>3</sub>                  | 2.91 | s  |
| 24. | Malonate               | CH <sub>2</sub>                    | 3.12 | s  |
| 25. | Gly                    | CH <sub>2</sub>                    | 3.56 | s  |
| 26. | Trigonelline           | CH <sub>3</sub>                    | 4.42 | s  |
| 27. | α-Glucose              |                                    | 3.41 | d  |
|     |                        |                                    | 3.55 |    |
|     |                        |                                    | 3.70 |    |
|     |                        |                                    | 3.83 |    |
|     |                        | CH                                 | 5.23 |    |
| 28. | α-Galactose            |                                    | 3.83 | d  |
|     |                        |                                    | 4.00 |    |
|     |                        | CH                                 | 5.27 |    |
| 29. | Uracil                 | CH                                 | 5.80 | d  |
|     |                        | CH                                 | 7.55 | d  |
| 30. | Orotate                | CH                                 | 6.19 | s  |
| 31. | Fumarate               | CH, CH'                            | 6.52 | s  |
| 32. | 4-hydroxyphenilacetate | CH-2, CH-6                         | 6.87 | pd |
|     |                        | CH-3, CH-5                         | 7.19 | pd |
| 33. | Tyr                    | CH-1, CH-5                         | 6.90 | d  |
|     |                        | CH-2, CH-4                         | 7.20 | d  |
| 34. | Phe                    | 5 CH ring                          | 7.38 | m  |
| 35. | Hypoxanthine           | CH                                 | 8.19 | s  |
|     |                        | CH                                 | 8.21 | s  |
| 36. | Guanine                | CH                                 | 7.90 | s  |
| 37. | Formate                | CH                                 | 8.46 | s  |

s: singlet; d: doublet; t: triplet; m: multiplet; pd: pseudo doublet, pt: pseudo triplet.

**Table S4. Classification analyses on the: metabolomic, metagenomic and omics data integration datasets (low level fusion analysis performed on the two matrices jointly elaborated).**

| Metabolomic dataset    |                    |              |                      |                 |                 |
|------------------------|--------------------|--------------|----------------------|-----------------|-----------------|
| Class                  | LVopt <sup>1</sup> | Accuracy (%) | Mean Class. Err. (%) | Sensitivity (%) | Specificity (%) |
| T1D                    | 8±2                | 66.9±5.7     | 34.8±6.1             | 75.5±5.9        | 54.9±10.4       |
| CTRL                   |                    |              |                      | 54.9±10.4       | 75.5±5.9        |
| T1DpH<7.32             | 7±2                | 61.0±6.8     | 39.8±6.9             | 56.5±8.6        | 64.0±7.9        |
| CTRL                   |                    |              |                      | 64.0±7.9        | 56.5±8.6        |
| T1DpH≥7.32             | 2±3                | 58.6±4.9     | 40.9±5.1             | 62.5±7.2        | 55.8±5.5        |
| CTRL                   |                    |              |                      | 55.8±5.5        | 62.5±7.2        |
| T1DpH≥7.32             | 3±2                | 55.5±5.6     | 44.5±5.6             | 56.2±8.9        | 54.9±6.4        |
| T1DpH<7.32             |                    |              |                      | 54.9±6.4        | 56.2±8.9        |
| Metagenomic dataset    |                    |              |                      |                 |                 |
| Class                  | LVopt              | Accuracy (%) | Mean Class. Err. (%) | Sensitivity (%) | Specificity (%) |
| T1D                    | 8±2                | 72.8±4.1     | 27.4±4.1             | 74.0±5.1        | 71.2±5.5        |
| CTRL                   |                    |              |                      | 71.2±5.5        | 74.0±5.1        |
| T1DpH<7.32             | 6±2                | 68.2±4.6     | 32.3±4.6             | 65.2±7.3        | 70.2±6.2        |
| CTRL                   |                    |              |                      | 70.2±6.2        | 65.2±7.3        |
| T1DpH≥7.32             | 8±2                | 78.3±3.9     | 23.1±4.3             | 68.0±7.5        | 85.8±3.2        |
| CTRL                   |                    |              |                      | 85.8±3.2        | 68.0±7.5        |
| T1DpH≥7.32             | 3±3                | 49.4±6.3     | 50.3±6.4             | 57.2±7.1        | 42.3±9.4        |
| T1DpH<7.32             |                    |              |                      | 42.3±9.4        | 57.2±7.1        |
| Omics Data Integration |                    |              |                      |                 |                 |
| Class                  | LVopt              | Accuracy (%) | Mean Class. Err. (%) | Sensitivity (%) | Specificity (%) |
| T1D                    | 4±1                | 91.3±3.2     | 9.2±3.4              | 93.8±3.1        | 87.8±5.8        |
| CTRL                   |                    |              |                      | 87.8±5.8        | 93.8±3.1        |
| T1DpH<7.32             | 3±2                | 90.2±2.5     | 11.6±2.7             | 79.2±4.5        | 97.6±2.8        |
| CTRL                   |                    |              |                      | 97.6±2.8        | 79.2±4.5        |
| T1DpH≥7.32             | 4±2                | 91.7±2.4     | 8.8 ±2.5             | 87.8±3.8        | 94.4±3.4        |
| CTRL                   |                    |              |                      | 94.4±3.4        | 87.8±3.8        |
| T1DpH≥7.32             | 1±1                | 67.8±3.6     | 32.5±3.7             | 60.0±6.5        | 75.1±3.3        |
| T1DpH<7.32             |                    |              |                      | 75.1±3.3        | 60.0±6.5        |

<sup>1</sup>optimal latent variable



**Table S5. Comparisons between: T1D vs. CTRL, T1DpH $\geq$ 7.32 vs. CTRL, T1DpH $<$ 7.32 vs. CTRL and T1DpH $\geq$ 7.32 vs. T1DpH $<$ 7.32.** Data were expressed by median, 25<sup>th</sup> percentile and 75<sup>th</sup> percentile. Significant metabolites and ASVs for the multi-block analysis were analyzed and reported below. Mann Whitney's u-test was performed. Bonferroni-corrected *p* values lower than 0.05 (\*) were considered significant.

|                               | T1D     |        |        | CTRL    |        |        | p value |
|-------------------------------|---------|--------|--------|---------|--------|--------|---------|
|                               | Median  | 25%    | 75%    | Median  | 25%    | 75%    |         |
| Isobutyrate                   | 0.701   | 0.571  | 1.145  | 0.604   | 0.153  | 0.863  | 0.044*  |
| Ethanol                       | 0.197   | 0.0839 | 0.344  | 0.329   | 0.238  | 0.584  | 0.024*  |
| Butyrate                      | 4.164   | 1.528  | 5.592  | 6.061   | 4.537  | 10.215 | 0.009*  |
| Malonate                      | 0.784   | 0.429  | 1.22   | 0.466   | 0.297  | 0.986  | 0.228   |
| Succinate                     | 0.246   | 0.175  | 0.474  | 0.389   | 0.228  | 0.701  | 0.058   |
| Galactose                     | 0.121   | 0.0948 | 0.188  | 0.334   | 0.236  | 0.465  | <0.001* |
| Bacteroidales                 | 0.242   | 0.0812 | 0.568  | 0       | 0      | 0      | <0.001* |
| <i>Alistipes</i>              | 0.246   | 0.0344 | 0.713  | 0.722   | 0.0259 | 5.74   | 0.209   |
| <i>Odoribacter</i>            | 0.00542 | 0      | 0.0505 | 0.00691 | 0      | 0.284  | 0.222   |
| Clostridiales                 | 3.07    | 1.55   | 5.67   | 0.679   | 0.181  | 1.98   | <0.001* |
| <i>Sutterella</i>             | 0.0164  | 0      | 0.0318 | 0.032   | 0      | 0.153  | 0.286   |
| Enterobacteriaceae            | 2.45    | 0.13   | 44.2   | 0.634   | 0.0353 | 3.37   | 0.03*   |
| <i>Akkermansia</i>            | 0.971   | 0.0445 | 21.5   | 26.1    | 2.93   | 50.5   | 0.011*  |
| Lachnospiraceae; Clostridium' | 0.159   | 0.0405 | 0.699  | 0.00256 | 0      | 0.18   | 0.002*  |
| <i>Actinomyces</i>            | 0       | 0      | 0.0178 | 0.00208 | 0      | 0.128  | 0.199   |
| [Mogibacteriaceae]            | 0.124   | 0.033  | 0.324  | 0.18    | 0.0689 | 1.138  | 0.209   |
| <i>Adlercreutzia</i>          | 0.00418 | 0      | 0.0127 | 0.027   | 0      | 0.152  | 0.033*  |
| <i>Collinsella</i>            | 0.0244  | 0      | 0.11   | 0.2     | 0.0415 | 0.987  | 0.016*  |
| <i>Turicibacter</i>           | 0.00956 | 0      | 0.0491 | 0.0132  | 0      | 0.246  | 0.425   |

  

|                                    | T1DpH $\geq$ 7.32 |         |        | CTRL    |        |        | p value |
|------------------------------------|-------------------|---------|--------|---------|--------|--------|---------|
|                                    | Median            | 25%     | 75%    | Median  | 25%    | 75%    |         |
| Ethanol                            | 0.212             | 0.0846  | 0.331  | 0.381   | 0.273  | 0.612  | 0.023*  |
| Butyrate                           | 4.298             | 1.643   | 5.82   | 6.716   | 5.121  | 14.728 | 0.034*  |
| Galactose                          | 0.138             | 0.096   | 0.199  | 0.368   | 0.294  | 0.555  | <0.001* |
| Isobutyrate                        | 1.023             | 0.422   | 1.488  | 0.402   | 0.134  | 0.914  | 0.057   |
| Malonate                           | 1.22              | 0.729   | 1.745  | 0.632   | 0.314  | 0.986  | 0.019*  |
| Succinate                          | 0.315             | 0.181   | 0.502  | 0.417   | 0.288  | 1.049  | 0.257   |
| Glucose                            | 0.324             | 0.162   | 0.57   | 1.23    | 1.008  | 2.426  | 0.023*  |
| Formate                            | 0.119             | 0.0889  | 0.187  | 0.0658  | 0.0375 | 0.128  | 0.07    |
| Bacteroidales                      | 0.444             | 0.139   | 0.799  | 0       | 0      | 0      | <0.001* |
| <i>Alistipes</i>                   | 0.324             | 0.0151  | 0.929  | 0.0759  | 0.0154 | 2.29   | 1       |
| <i>Odoribacter</i>                 | 0.032             | 0       | 0.0785 | 0       | 0      | 0.163  | 0.686   |
| Firmicutes                         | 0.0315            | 0.0047  | 0.0891 | 0       | 0      | 0      | <0.001* |
| Clostridiales                      | 1.94              | 1.09    | 3.89   | 1.03    | 0.227  | 2.74   | 0.112   |
| <i>Sutterella</i>                  | 0.0128            | 0       | 0.0441 | 0.00222 | 0      | 0.105  | 0.937   |
| Enterobacteriaceae                 | 0.909             | 0.0911  | 36.7   | 1.09    | 0.0477 | 2.05   | 0.597   |
| <i>Akkermansia</i>                 | 0.547             | 0.0179  | 26.1   | 28.8    | 12.6   | 47.6   | 0.039*  |
| Rikenellaceae                      | 0.263             | 0.0157  | 0.578  | 0.0218  | 0      | 0.155  | 0.08    |
| Peptostreptococcaceae              | 0.0199            | 0.00388 | 0.0618 | 0       | 0      | 0      | 0.004*  |
| <i>Actinomyces</i>                 | 0.00314           | 0       | 0.0117 | 0.0589  | 0      | 0.171  | 0.079   |
| Clostridiaceae; <i>Clostridium</i> | 0.0854            | 0.0327  | 0.151  | 0.318   | 0.117  | 1.91   | 0.023*  |

  

|               | T1DpH $<$ 7.32 |        |       | CTRL   |       |        | p value |
|---------------|----------------|--------|-------|--------|-------|--------|---------|
|               | Median         | 25%    | 75%   | Median | 25%   | 75%    |         |
| Ethanol       | 0.143          | 0.054  | 0.318 | 0.308  | 0.232 | 0.601  | 0.123   |
| Isobutyrate   | 0.876          | 0.667  | 1.026 | 0.628  | 0.159 | 0.89   | 0.029*  |
| Galactose     | 0.12           | 0.0594 | 0.177 | 0.313  | 0.175 | 0.41   | 0.007*  |
| Malonate      | 0.549          | 0.166  | 0.606 | 0.454  | 0.296 | 0.966  | 0.445   |
| Butyrate      | 4.273          | 2.453  | 5.785 | 6.662  | 4.077 | 11.101 | 0.158   |
| Bacteroidales | 0.155          | 0.0438 | 0.237 | 0      | 0     | 0      | <0.001* |

|                                     |        |        |        |         |        |        |         |
|-------------------------------------|--------|--------|--------|---------|--------|--------|---------|
| <i>Alistipes</i>                    | 0.246  | 0.0361 | 0.604  | 0.0922  | 0.0158 | 1.05   | 0.622   |
| <i>Odoribacter</i>                  | 0      | 0      | 0.0231 | 0       | 0      | 0.104  | 0.693   |
| Firmicutes                          | 0.0651 | 0.0397 | 0.335  | 0       | 0      | 0      | <0.001* |
| Clostridiales                       | 4.57   | 2.96   | 6.55   | 1.18    | 0.265  | 2.57   | 0.002*  |
| <i>Sutterella</i>                   | 0.0141 | 0      | 0.06   | 0.00443 | 0      | 0.0843 | 0.89    |
| Enterobacteriaceae                  | 8.2    | 0.558  | 56     | 1.02    | 0.0515 | 1.66   | 0.023*  |
| <i>Akkermansia</i>                  | 5.73   | 0.0542 | 19.05  | 26.788  | 0.363  | 62.394 | 0.048*  |
| Lachnospiraceae; <i>Clostridium</i> | 0.577  | 0.13   | 1.897  | 0.031   | 0      | 0.276  | 0.011*  |
| <i>Faecalibacterium</i>             | 0.818  | 0.141  | 2.699  | 1.546   | 0.572  | 2.874  | 0.25    |
| Clostridiaceae                      | 0.0545 | 0.0231 | 0.267  | 0.0183  | 0      | 0.318  | 0.188   |
| _Peptostreptococcaceae              | 0.0379 | 0.0152 | 0.164  | 0       | 0      | 0      | <0.001* |
| [Mogibacteriaceae]                  | 0.166  | 0.0132 | 0.745  | 0.759   | 0.151  | 2.104  | 0.061   |
| <i>Bacteroides</i>                  | 9.021  | 1.527  | 16.072 | 2.94    | 0.215  | 14.881 | 0.45    |

#### T1DpH≥7.32

#### T1DpH<7.32

|                        | Median | 25%     | 75%     | Median | 25%     | 75%    | p value |
|------------------------|--------|---------|---------|--------|---------|--------|---------|
| DMA                    | 0.0548 | 0.0407  | 0.0625  | 0.0578 | 0.0447  | 0.0947 | 0.514   |
| Uracil                 | 1.061  | 0.777   | 1.1     | 0.767  | 0.528   | 0.854  | 0.017*  |
| Guanine                | 0.534  | 0.504   | 0.586   | 0.363  | 0.233   | 0.429  | 0.009*  |
| Formate                | 0.119  | 0.0906  | 0.163   | 0.0491 | 0.0286  | 0.0871 | 0.002*  |
| 2-methylbutyrate       | 1.323  | 0.967   | 1.569   | 0.933  | 0.752   | 1.298  | 0.074   |
| Isovalerate            | 1.425  | 1.107   | 1.552   | 1.09   | 0.877   | 1.443  | 0.151   |
| 2-Aminoisobutyrate     | 0.895  | 0.561   | 1.353   | 0.584  | 0.493   | 0.901  | 0.082   |
| Propionate             | 9.649  | 6.693   | 13      | 7.01   | 2.721   | 9.116  | 0.113   |
| Glu                    | 4.942  | 4.147   | 5.607   | 3.624  | 2.604   | 5.352  | 0.078   |
| Malonate               | 1.114  | 0.793   | 1.564   | 0.583  | 0.21    | 0.801  | 0.015*  |
| Fumarate               | 0.0618 | 0.0411  | 0.102   | 0.0493 | 0.0244  | 0.0568 | 0.059   |
| Hypoxanthine           | 0.391  | 0.23    | 0.511   | 0.272  | 0.204   | 0.338  | 0.042*  |
| Coriobacteriaceae      | 0.0408 | 0.0193  | 0.123   | 0.0233 | 0.0142  | 0.0833 | 0.252   |
| <i>Eggerthella</i>     | 0      | 0       | 0.00949 | 0.0496 | 0.00886 | 0.222  | 0.004*  |
| Bacteroidales          | 0.444  | 0.198   | 0.8     | 0.192  | 0.0519  | 0.248  | 0.064   |
| <i>Bacteroides</i>     | 14     | 3.01    | 43      | 9.02   | 1.36    | 14.9   | 0.192   |
| <i>Parabacteroides</i> | 0.292  | 0.035   | 0.884   | 0.0782 | 0.0208  | 0.352  | 0.211   |
| Rikenellaceae          | 0.263  | 0.0208  | 0.624   | 0.0428 | 0.00661 | 0.185  | 0.108   |
| <i>Alistipes</i>       | 0.482  | 0.0297  | 1.05    | 0.21   | 0.0344  | 0.507  | 0.355   |
| <i>Odoribacter</i>     | 0.0416 | 0       | 0.0815  | 0      | 0       | 0.0149 | 0.033*  |
| Clostridiales          | 2.92   | 1.23    | 4.6     | 3.07   | 2.19    | 6.21   | 0.231   |
| Christensenellaceae    | 0.0844 | 0.0129  | 0.266   | 0.365  | 0.0421  | 0.942  | 0.172   |
| Clostridiaceae         | 0.0188 | 0.00147 | 0.0916  | 0.0545 | 0.0248  | 0.244  | 0.06    |
| <i>Clostridium</i>     | 0.11   | 0.034   | 0.258   | 0.423  | 0.0865  | 1.66   | 0.047*  |
| <i>Oscillospira</i>    | 1.08   | 0.122   | 1.76    | 0.911  | 0.24    | 3.02   | 0.55    |
